# Supplementary material for: Synthesis of one-dimensional WO3–Bi2WO6 heterojunctions with enhanced photocatalytic activity
Source: Royal Society of Chemistry journal article supplement (doi:10.1039/c4ce01884b), 2014-10-17
Supplement: c4ce01884b1.pdf [file c4ce01884b1.pdf]

## SUPPORTING INFORMATION

### **Synthesis of one-dimensional WO<sub>3</sub>-Bi<sub>2</sub>WO<sub>6</sub> heterojunctions with enhanced photocatalytic activity**

**Yin Peng<sup>\*a</sup>, Qing-Guo Chen<sup>a</sup>, Dan Wang<sup>a</sup>, Hai-Yan Zhou<sup>a</sup> and An-Wu Xu<sup>\*b</sup>**

<sup>a</sup>The Key Laboratory of Functional Molecular Solids, Ministry of Education, College of Chemistry and Materials Science, Anhui Normal University, Wuhu 241000, China

<sup>b</sup>Division of Nanomaterials and Chemistry, Hefei National Laboratory for Physical Sciences at Microscale, Department of Chemistry, University of Science and Technology of China, Hefei 230026, P. R China.  
Fax: (+86) 551-6360 2346; E-mail: [anwuxu@ustc.edu.cn](mailto:anwuxu@ustc.edu.cn)

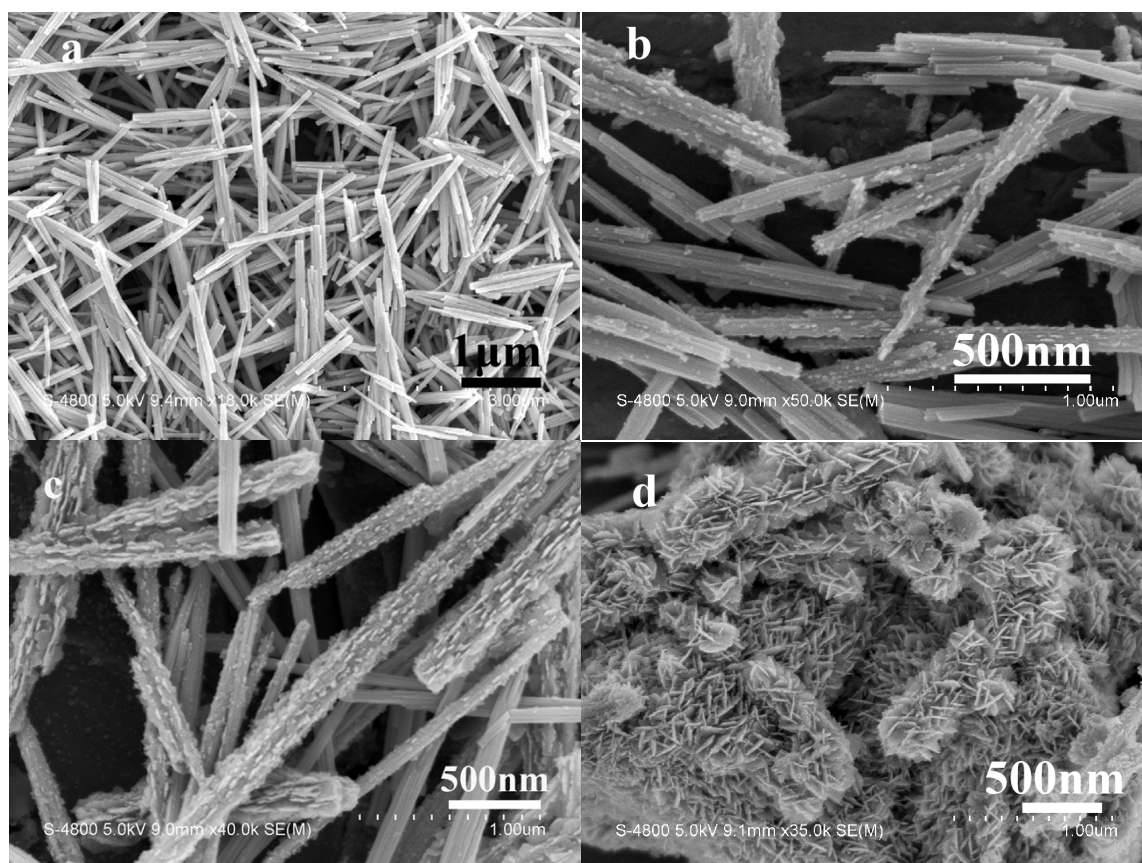

Fig. S1 Low magnification SEM images of (a) pure  $\text{WO}_3$ , (b) S1, (c) S2 and (d) S3.

Table S1. Surface areas and pore volumes of different Samples

| Samples                  | BET surface area ( $\text{cm}^2 \text{g}^{-1}$ ) | pore volume ( $\text{cm}^3 \text{g}^{-1}$ ) |
|--------------------------|--------------------------------------------------|---------------------------------------------|
| S1                       | 15.135                                           | 0.0786                                      |
| S2                       | 23.102                                           | 0.147                                       |
| S3                       | 17.252                                           | 0.0755                                      |
| $\text{WO}_3$            | 27.390                                           | 0.0913                                      |
| $\text{Bi}_2\text{WO}_6$ | 15.426                                           | 0.102                                       |

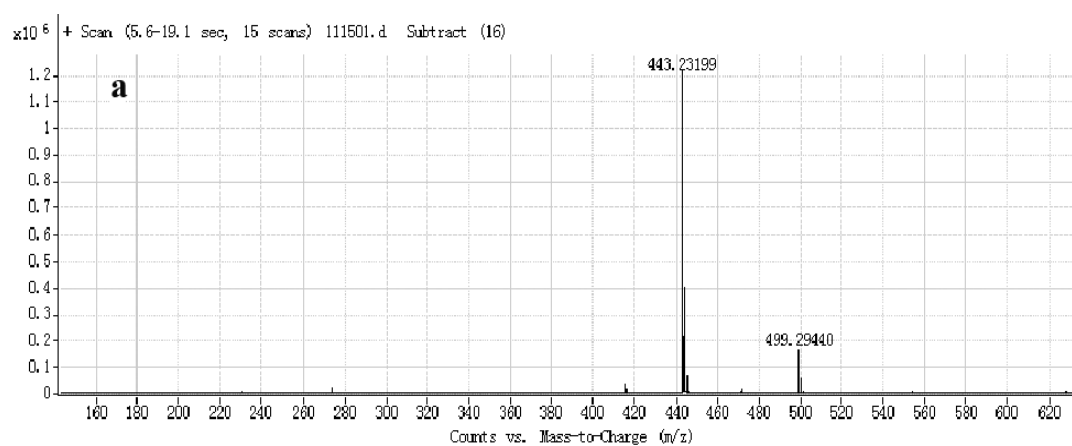

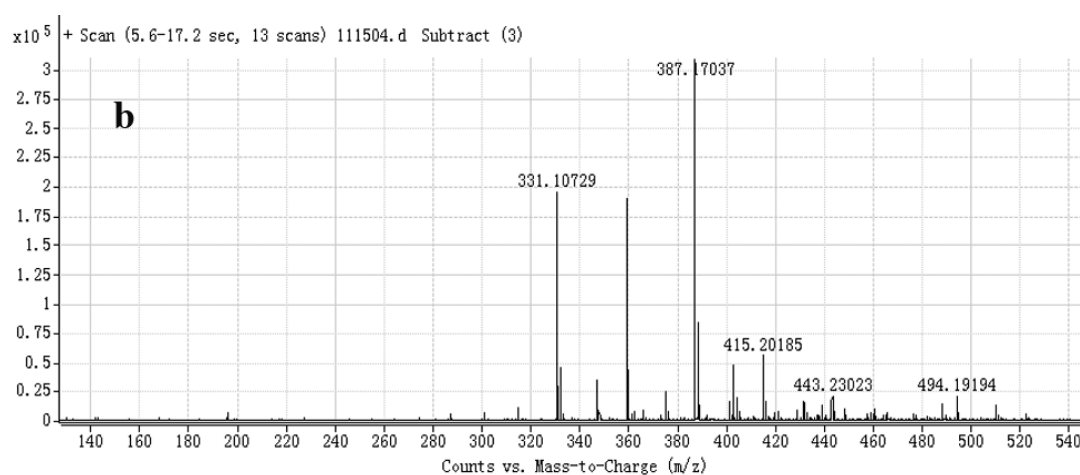

Fig. S2 The mass spectra of butyl rhodamine before (a) and after (b) being irradiated for 0.5 h in the presence of S2 photocatalyst.

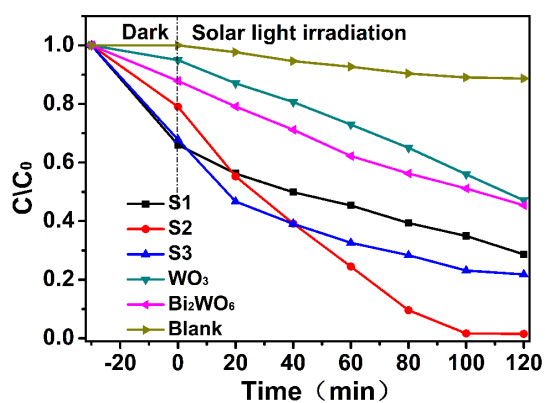

**Figure S3.** The degradation curves of phenol using different photocatalysts under solar light irradiation.
